# Supplementary material
Source: Springer Nature journal article supplement (https://www.springermedizin.de/resource/supplementary/12885_2011_2727_MOESM6_ESM.pdf/9461908)

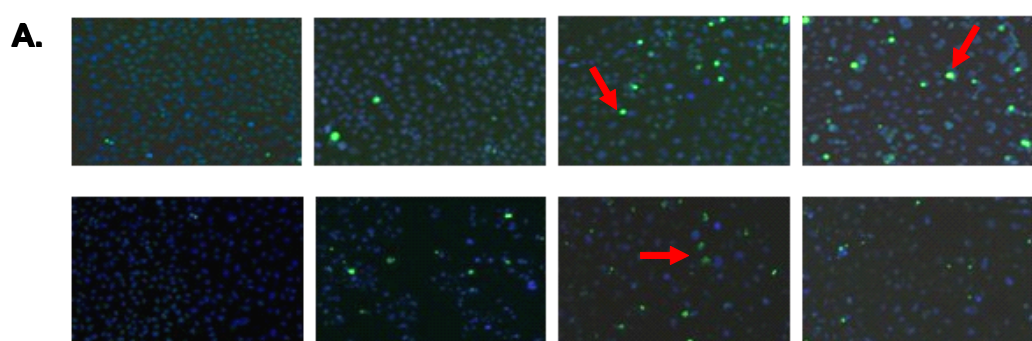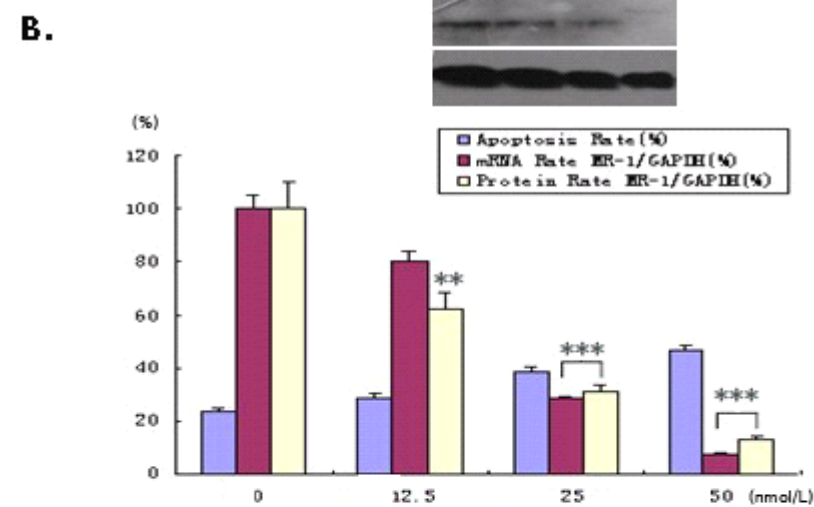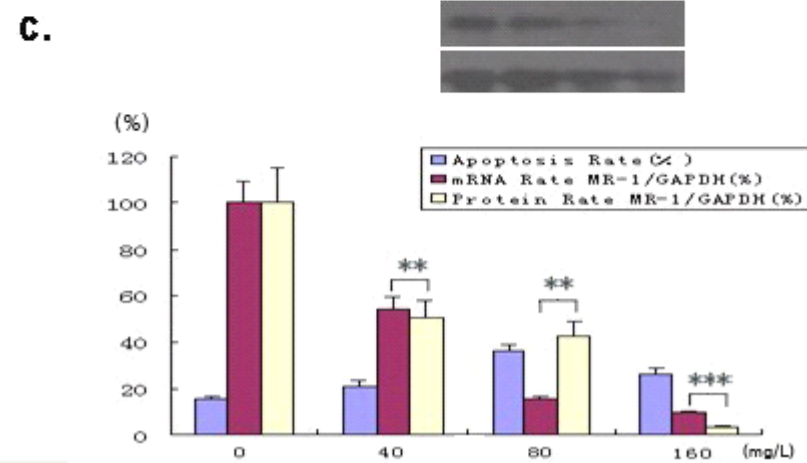

Supplement: MOESM6 [file 9461908]
